# Supplementary material for: Selection against tandem splice sites affecting structured protein regions
Source: Springer Nature journal article supplement (doi:10.1186/1471-2148-8-89), 2008-01-01
Supplement: Additional file 11 [file 1471-2148-8-89-s11.pdf]

**Additional File 11:** Average hydropathy scores for introns without tandem donor or acceptor motifs (control introns) and for introns with tandem donors and acceptors.

| context length | control introns    | tandem donor       |                      | tandem acceptor    |                      |
|----------------|--------------------|--------------------|----------------------|--------------------|----------------------|
|                | average hydropathy | average hydropathy | P-value <sup>a</sup> | average hydropathy | P-value <sup>a</sup> |
| ±3             | -0.36              | -0.43              | 0.58                 | -0.59              | <0.0001              |
| ±5             | -0.30              | -0.35              | 0.47                 | -0.53              | <0.0001              |
| ±10            | -0.26              | -0.32              | 0.14                 | -0.44              | <0.0001              |
| ±15            | -0.26              | -0.25              | 0.97                 | -0.40              | 0.0016               |

<sup>a</sup> Wilcoxon rank sum test comparing control introns with tandem donors/acceptors

To avoid potential biases, we excluded the insertion sequence of tandem donors and acceptors from the context.
